# Supplementary material
Source: HighWire-hosted journal article supplement (https://bmjopen.bmj.com/content/14/4/e080961)
Supplement: inline-supplementary-material-2 [file inline-supplementary-material-2.pdf]

**Shared decision making for labour and birth**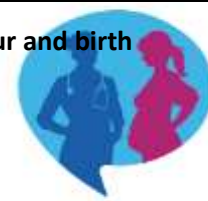**Staff focus group questions**

**Intro:** This study focusses on shared decision making. We're trying to understand your experiences of supporting women in their decision making.

**We also want to find out about what you think is needed to optimise the support that you provide to women when making decisions.**

**Topic area 1:**

**Have you heard of shared decision making, what does it mean to you?**

Prompt: exchange of information, listening, sharing, weighing, balancing

**What do you think the important elements of decision making are?**

**Topic area 2:**

**Can you describe your personal experience of supporting women to make decisions?**

Prompts: antenatally birth choices, ERCS vs VBAC, during labour, analgesia choices and pain management, instrumental delivery vs CS, Foetal blood sampling, birthing positions.

**Topic area 3 :**

**Do you think women are well informed and prepared for the interventions, or medical care they might receive during labour and birth?**

Appropriate expectations

Prompts: where do you think they get their information from, do you think the information they have is accurate and sufficient? What information do women receive about intrapartum interventions?

**Do you think this affects their decision making ability?**

**Topic area 4:****How can we better support women to make decisions during labour and birth?**

More training for health care professionals , More consultations, more antenatal classes, videos, leaflets

**Topic area 5:****Which interventions, or decision choices do you think we should be focus on when practising shared decision making?**

**For example** Which interventions are women least expecting? Least information. Most uncertainty, distress

**Topic area 6:****Are there any interventions that should not involve shared decision making during labour?**

Prompts: are you happy to participate in supporting shared decision making for all interventions?  
Life threatening emergencies are not usually expected to involve shared decision making – what is a life-threatening emergency to you?
